## ERRATUM

In the Editorial by London M. J., published in the February 2002 issue of ANESTHESIOLOGY (2002; 96:259-61), the last sentence in paragraph 5 should have read as follows:

“Possible explanations include (1) nearly all stress tests in this country use computerized 12-lead systems, (2) there is strong evidence that a positive response in multiple leads (along with greater magnitude of depression and presence of a downsloping ST-segment) is related to a larger area of myocardium at risk<sup>16,17</sup> and (3) despite calls for cost containment, thallium imaging, even after a positive exercise treadmill test is very common (as is cardiac catheterization).”

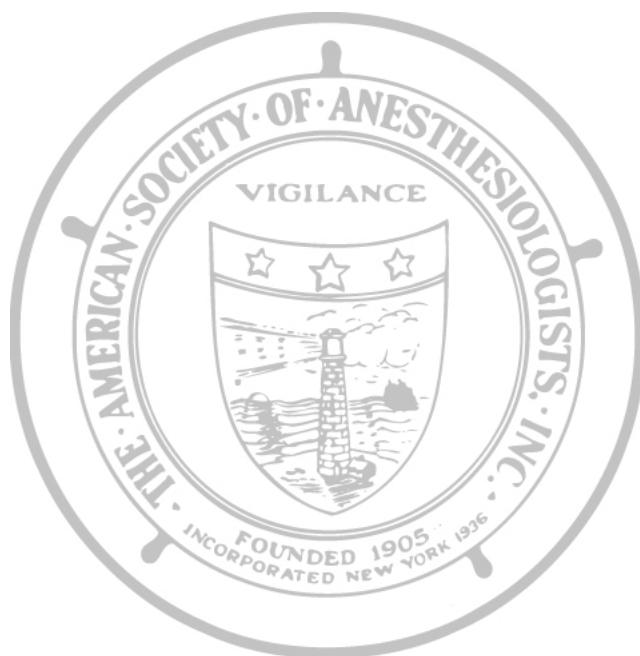

**Unauthorized Use  
Prohibited**
